# Supplementary material for: Development of highly thermoresponsive fluorescent sensors consisting of plasmonic silver nanoprisms and poly(N-isopropylacrylamide)–fluorophore composites
Source: Royal Society of Chemistry journal article supplement (doi:10.1039/c4pp00375f), 2015-03-17
Supplement: c4pp00375f1.pdf [file c4pp00375f1.pdf]

**Development of Highly Thermoresponsive Fluorescence Sensor  
Consisting of Plasmonic Silver Nanoprisms and Poly(N-  
isopropylacrylamide)-Fluorophore Composites**

*Kosuke Sugawa, \* Ryutaro Ichikawa, Naoto Takeshima, Yoshimasa Tanoue, Joe Otsuki*

College of Science and Technology, Nihon University, Chiyoda, Tokyo 101-8308, Japan

This file includes:

1) Supporting Figures S1-S4.

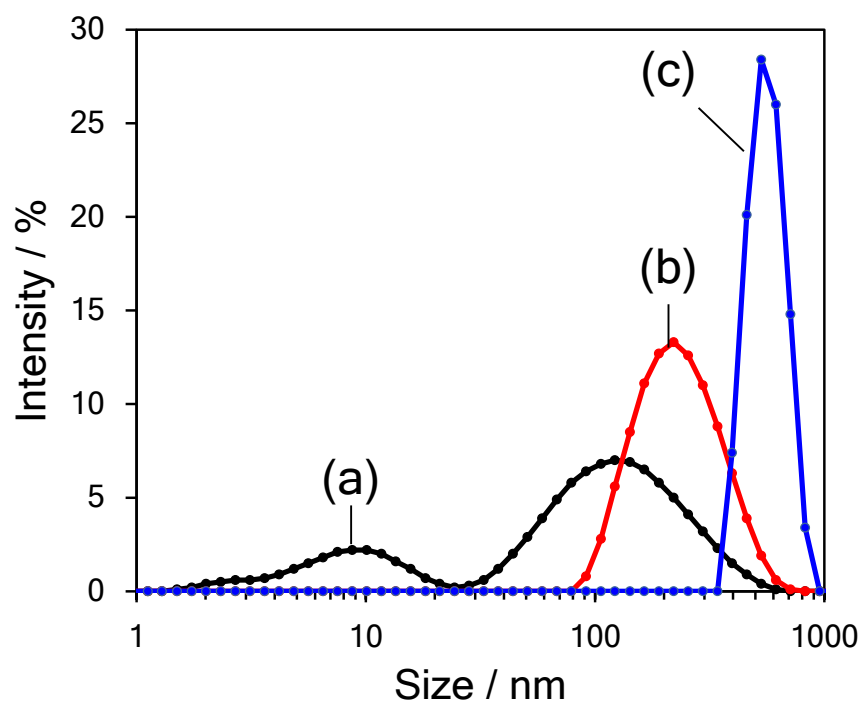

Figure S1 DLS data showing distribution of hydrodynamic sizes of (a) AgPRs and FITC/PNIPAm/AgPRs at (b) 20 and (c) 40 °C.

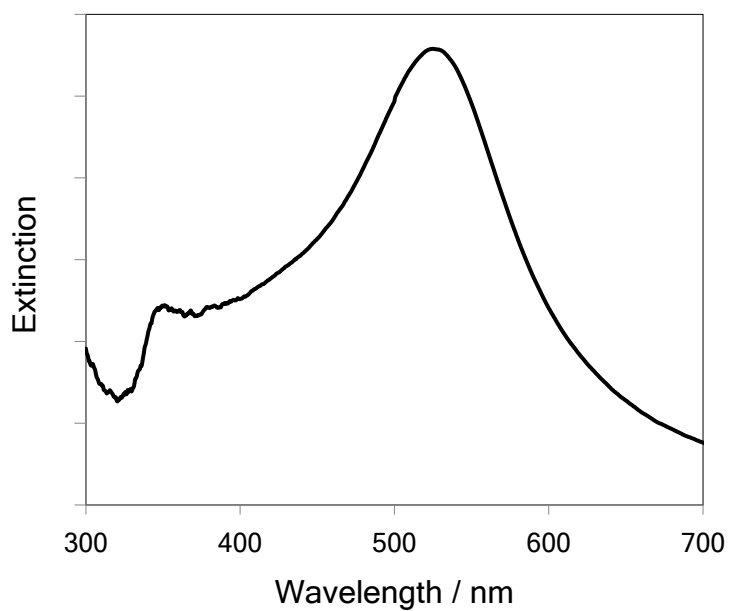

Figure S2 Extinction spectrum of the hybrids prepared using PNIPAm, which did not contain FITC.

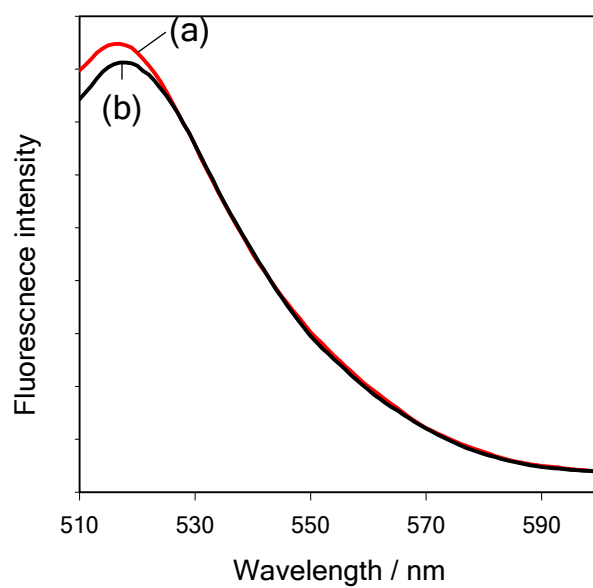

Figure S3 Fluorescence spectra ( $\lambda_{\text{ex}} = 490 \text{ nm}$ ) of a solution of FITC-PNIPAm conjugate at (a) 20 and (b) 40 °C.

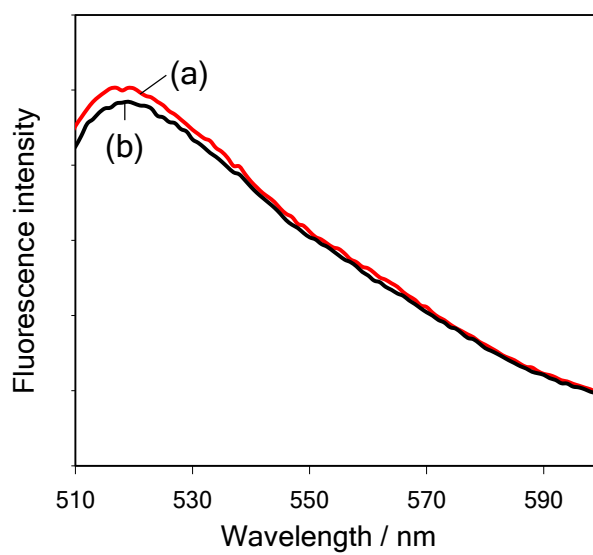

Figure S4 Fluorescence spectra ( $\lambda_{\text{ex}} = 490 \text{ nm}$ ) of a solution of FITC at (a) 20 and (b) 40 °C.
